# Supplementary material for: Successful synthesis of blocked polyisocyanates, using easily cleavable phenols as blocking agents, and their deblocking and cure studies
Source: Royal Society of Chemistry journal article supplement (doi:10.1039/c6ra24409b), 2016-01-01
Supplement: c6ra24409b1.pdf [file c6ra24409b1.pdf]

## SUPPORTING INFORMATION

### **Successful synthesis of blocked polyisocyanates using easily cleavable phenols as blocking agents and their deblocking and cure studies.**

S. Kalaimani, B. Mohamad Ali and A. Sultan Nasar\*

Department of Polymer Science, University of Madras, Guindy Campus, Chennai-

600025, India. E-mail: [drasultannasar@yahoo.com](mailto:drasultannasar@yahoo.com); [drasultannasar@unom.ac.in](mailto:drasultannasar@unom.ac.in);

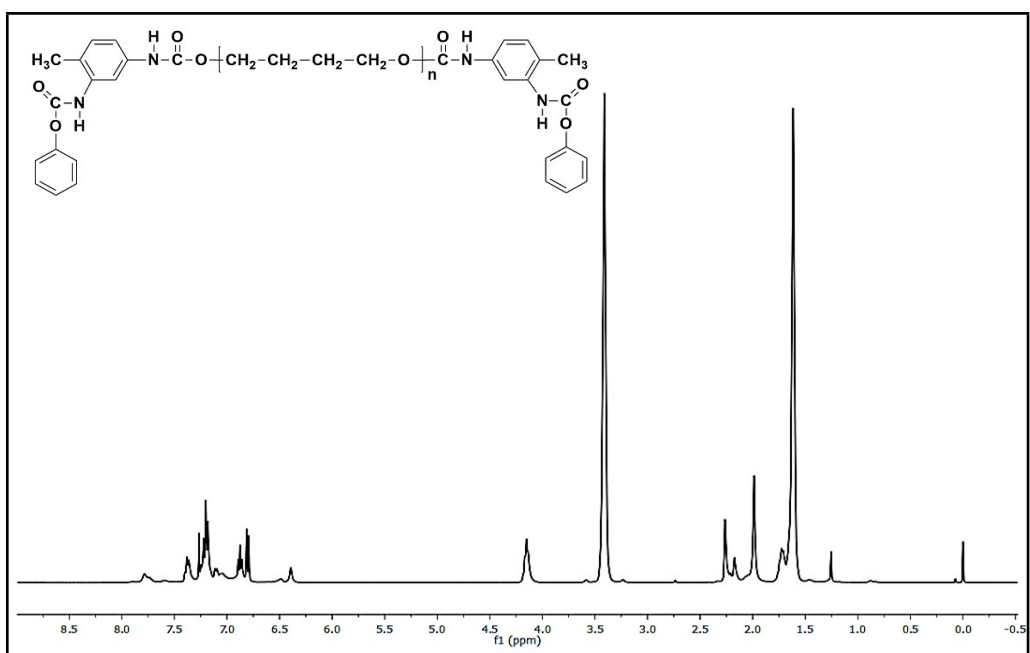

**Fig. S1.**  $^1\text{H-NMR}$  spectrum of phenol-blocked polyisocyanate (Solvent:  $\text{CDCl}_3$ ).

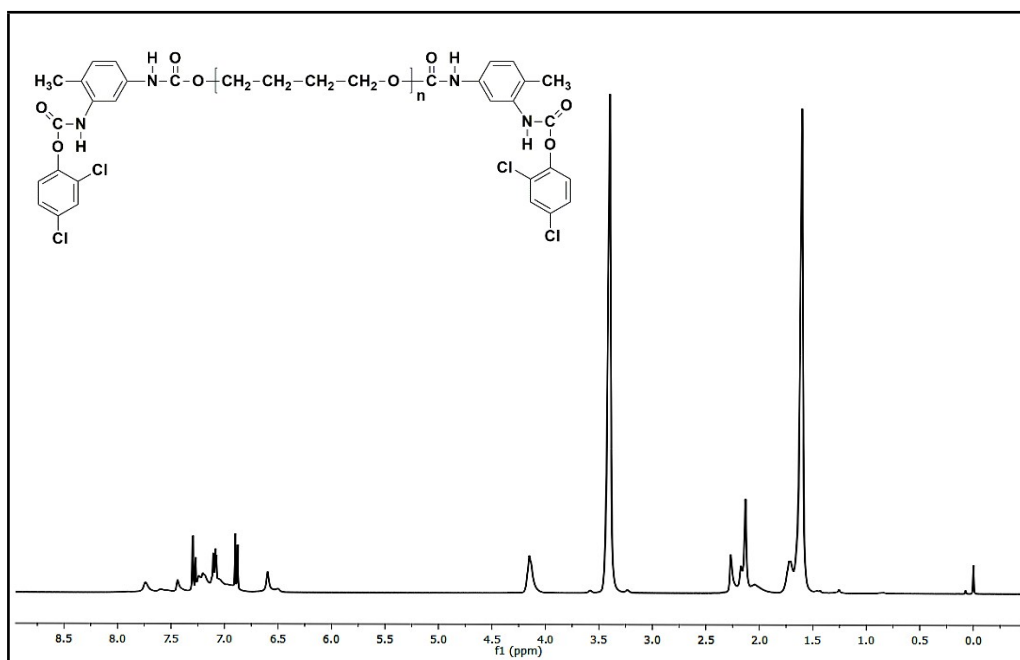

**Fig. S2.**  $^1\text{H-NMR}$  spectrum of 2,4-dichlorophenol-blocked polyisocyanate (Solvent:  $\text{CDCl}_3$ ).

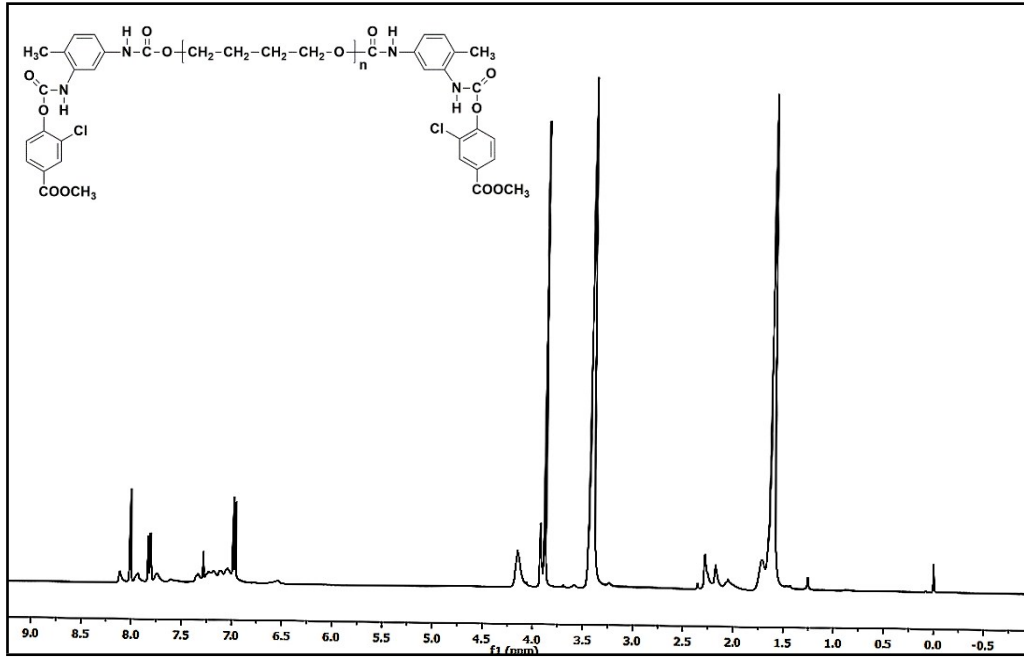

**Fig. S3.**  $^1\text{H-NMR}$  spectrum of methyl 3-chloro-4-hydroxybenzoate-blocked polyisocyanate (Solvent:  $\text{CDCl}_3$ ).

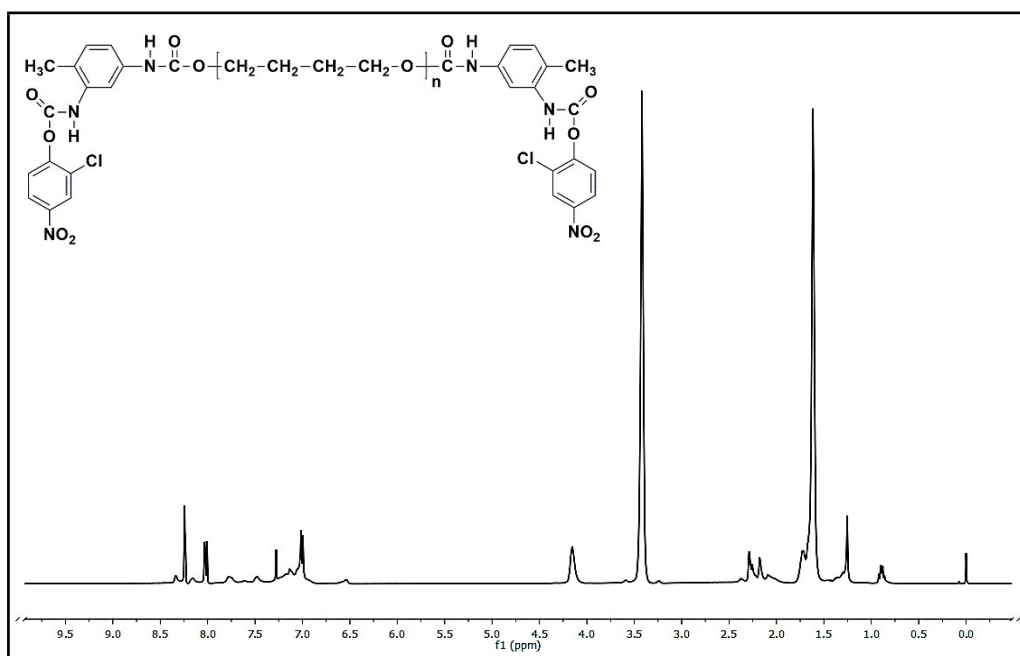

**Fig. S4.**  $^1\text{H-NMR}$  spectrum of 2-chloro-4-nitrophenol-blocked polyisocyanate (Solvent:  $\text{CDCl}_3$ ).



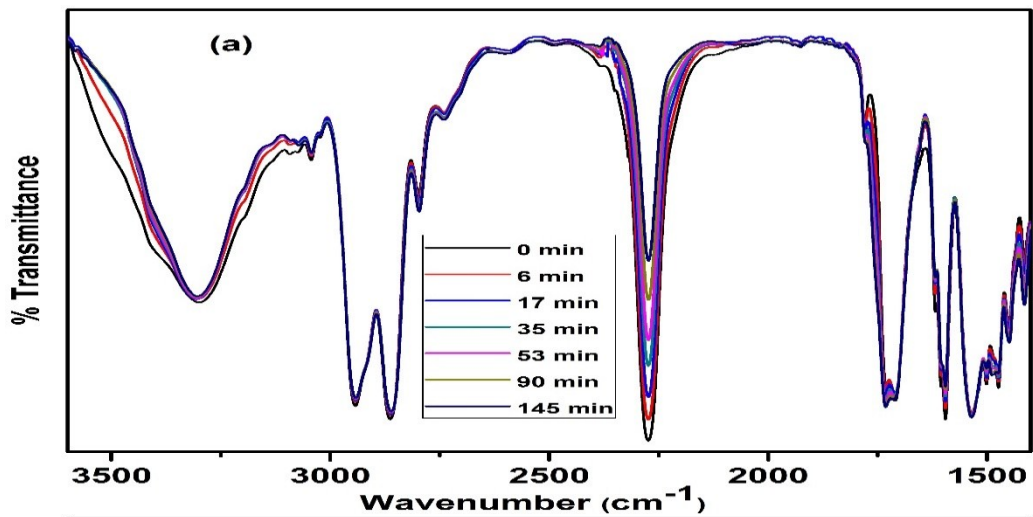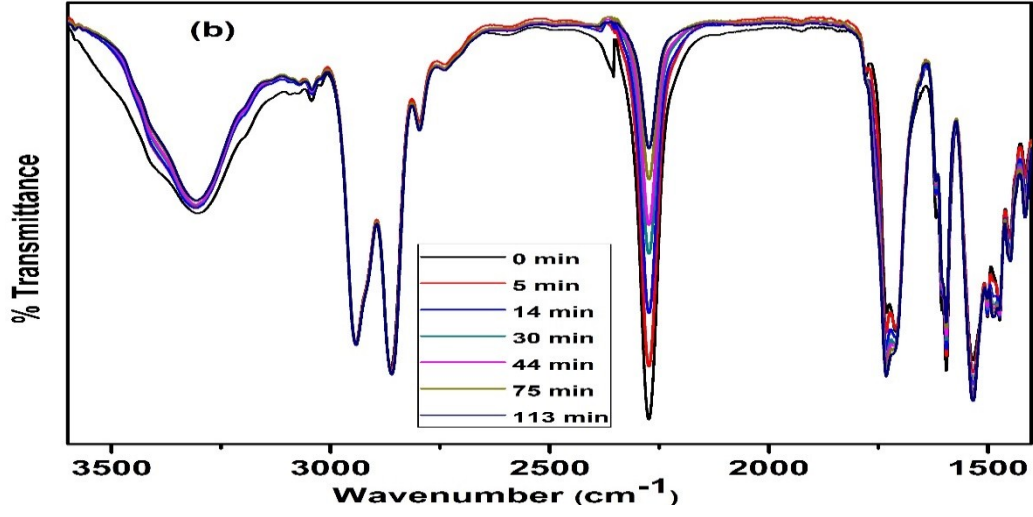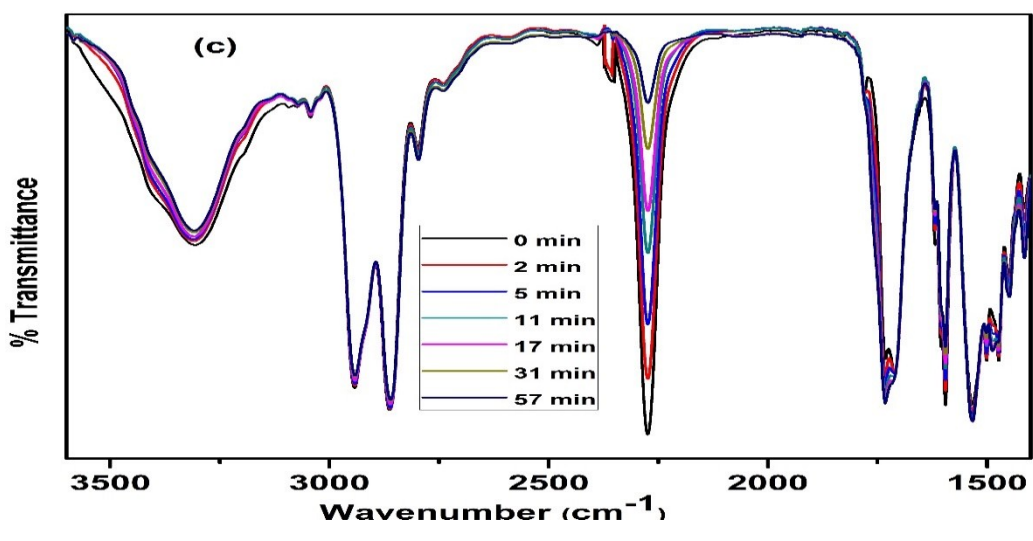

Fig. S5. FT-IR spectra recorded for different time intervals at isothermal conditions for the blocking reaction of polyisocyanate with phenol; (a) 40 °C (b) 50 °C and (c) 60 °C.

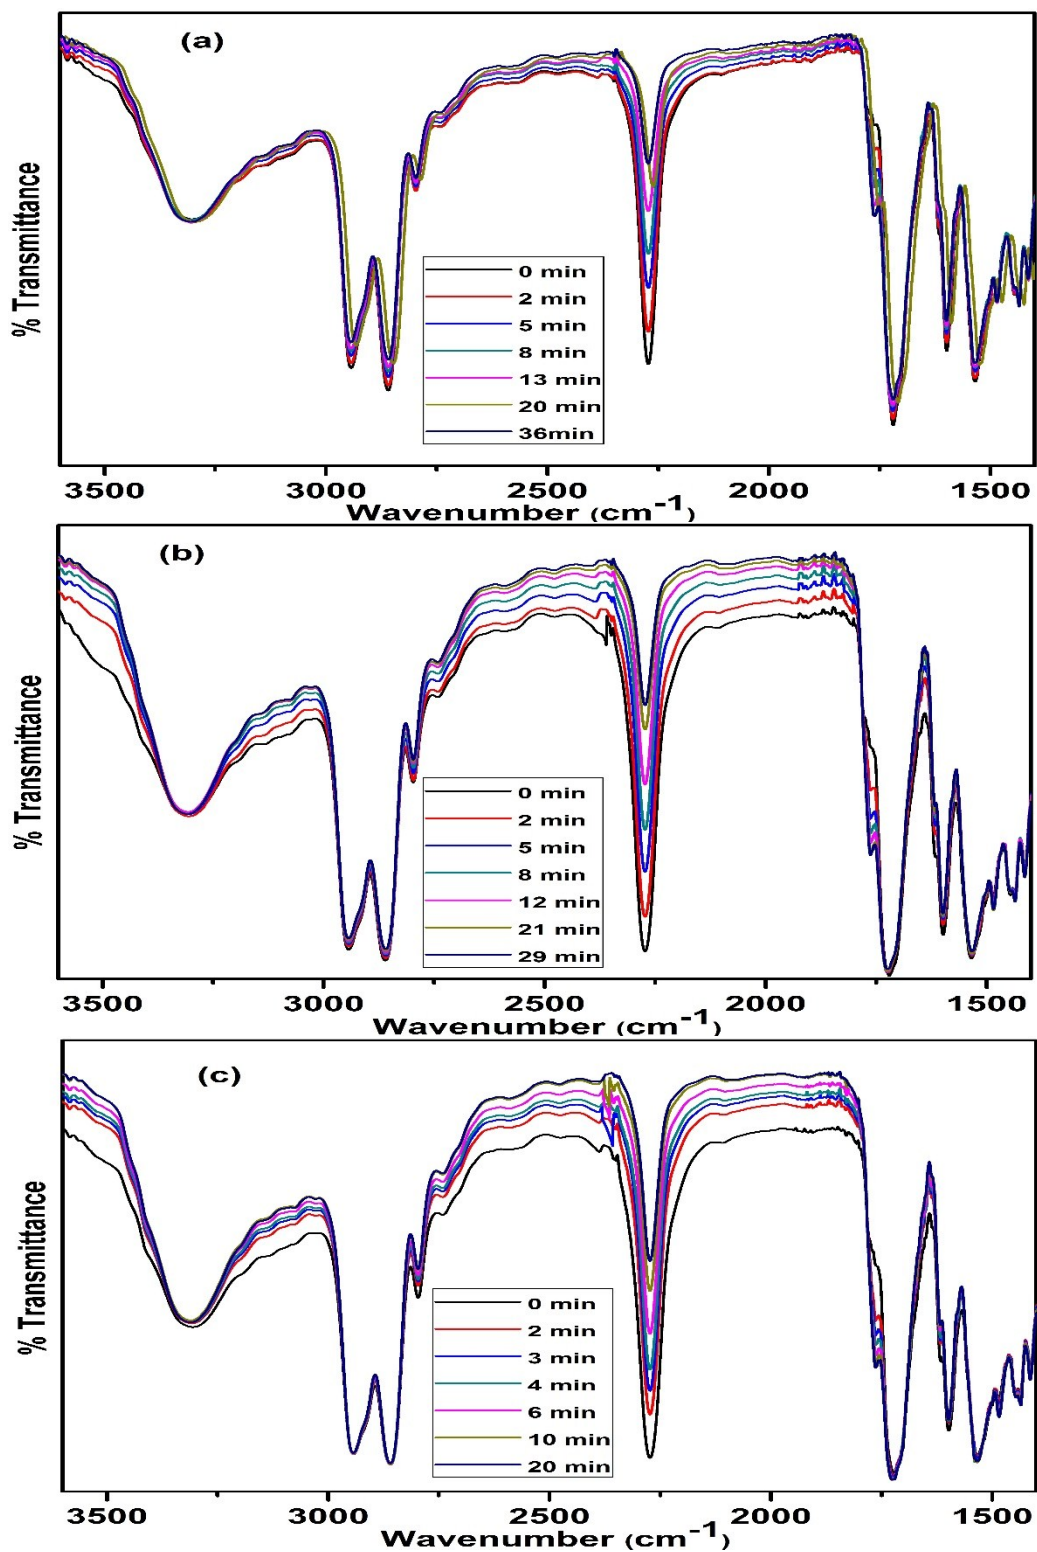

**Fig. S6.** FT-IR spectra recorded for different time intervals at isothermal conditions for the blocking reaction of polyisocyanate with methyl 3-chloro-4-hydroxybenzoate; (a) 40 °C (b) 50 °C and (c) 60 °C.

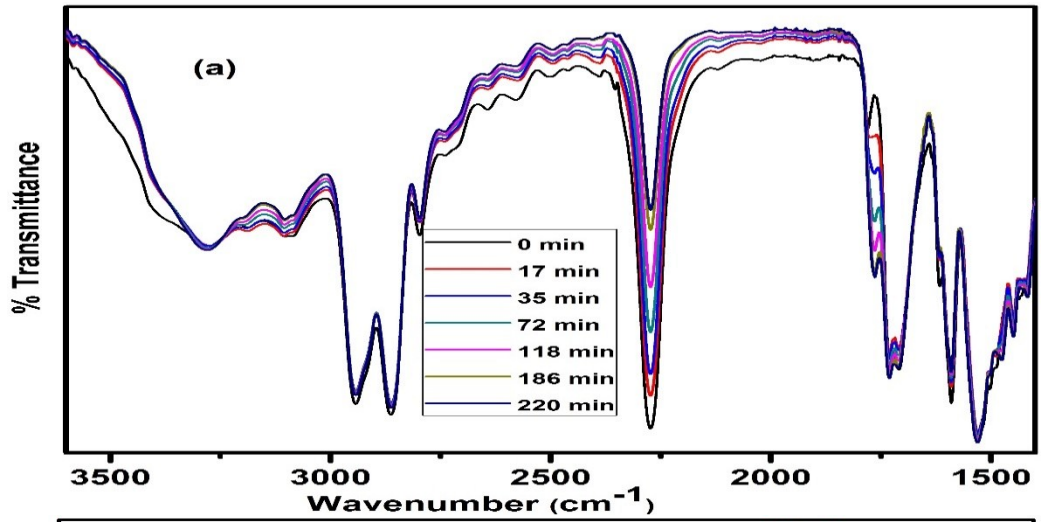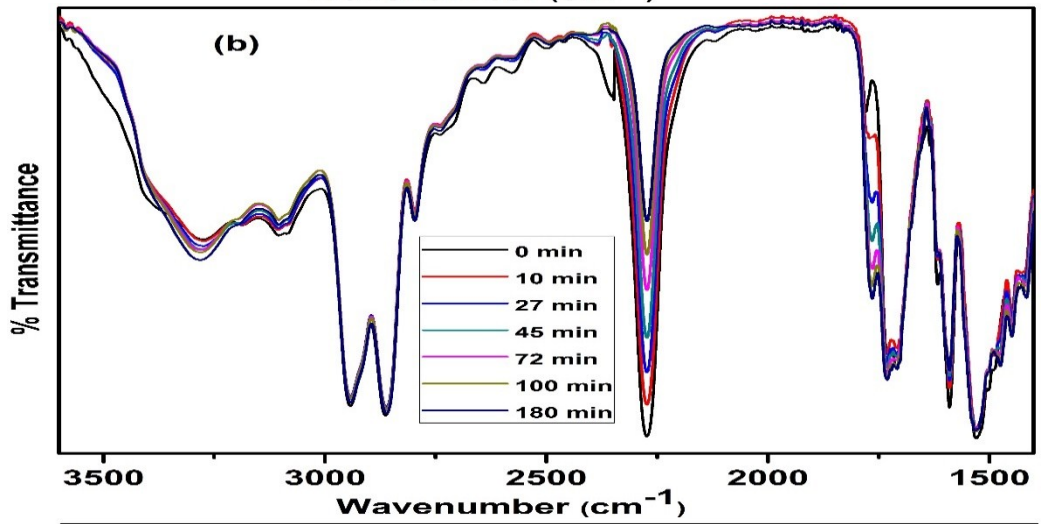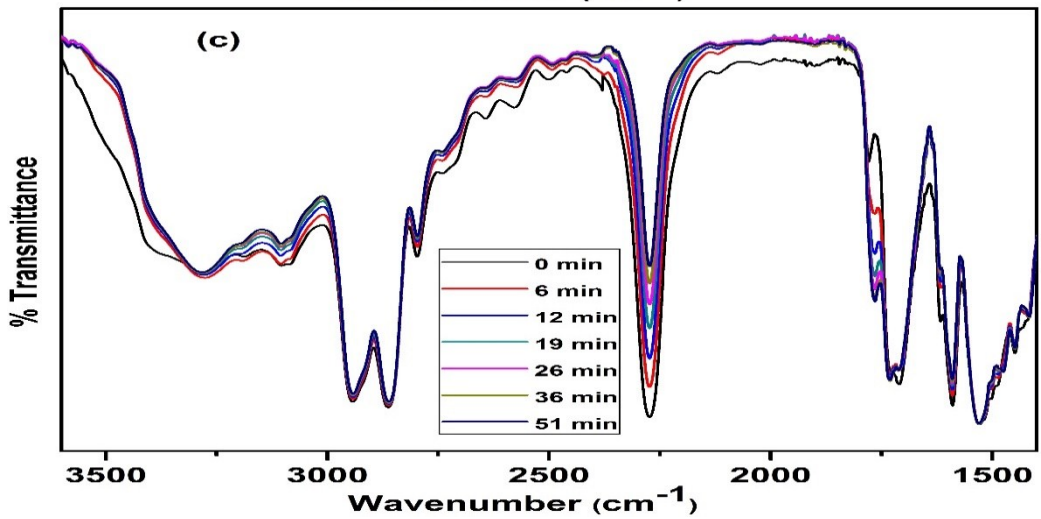

**Fig. S7.** FT-IR spectra recorded for different time intervals at isothermal conditions for the blocking reaction of polyisocyanate with 2-chloro-4-nitrophenol; (a) 40 °C (b) 50 °C and (c) 60 °C.

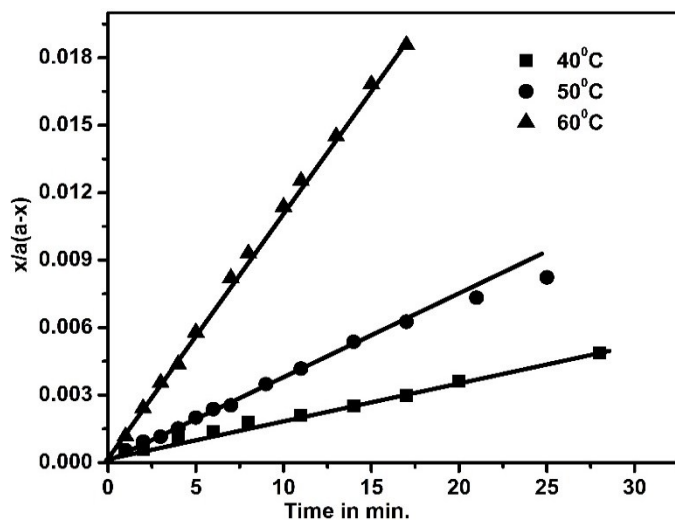

**Fig. S8.** Amine-catalyzed second-order kinetic plots of blocking reaction of polyisocyanate with phenol.

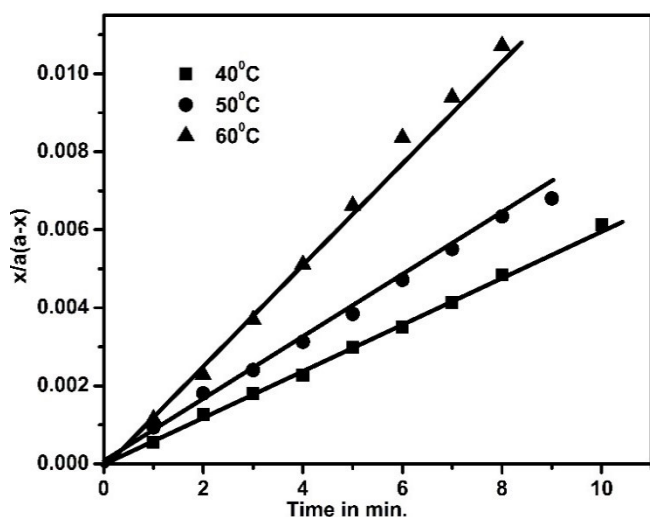

**Fig. S9.** Amine-catalyzed second-order kinetic plots of blocking reaction of polyisocyanate with 3-chloro-4-hydroxybenzoate.

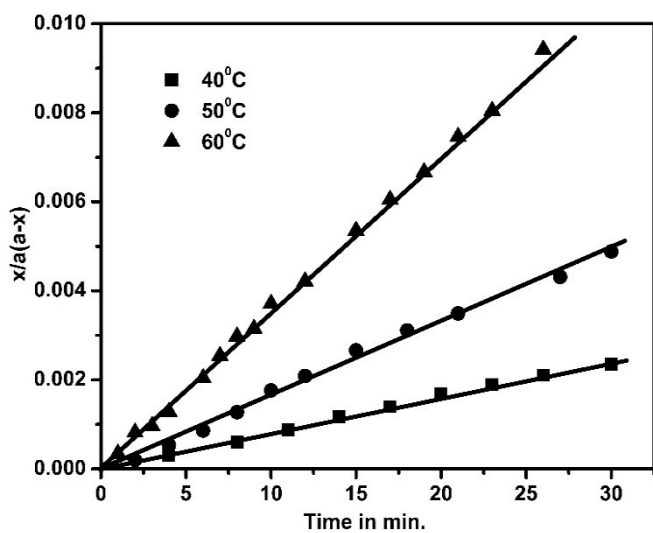

**Fig. S10.** Amine-catalyzed second-order kinetic plots of blocking reaction of polyisocyanate with 2-chloro-4-nitrophenol.

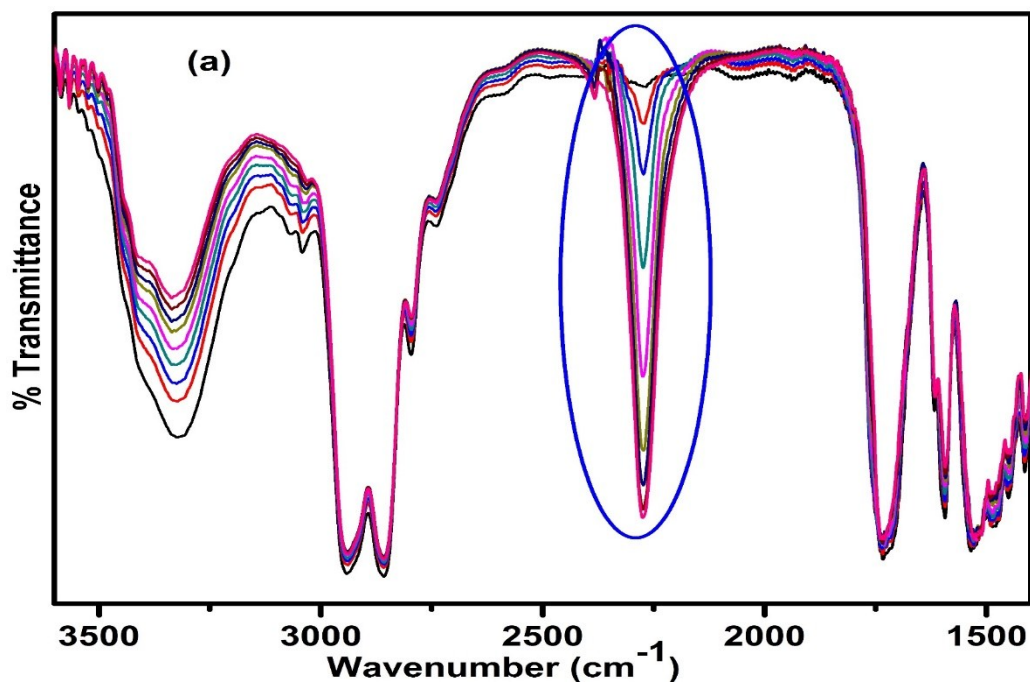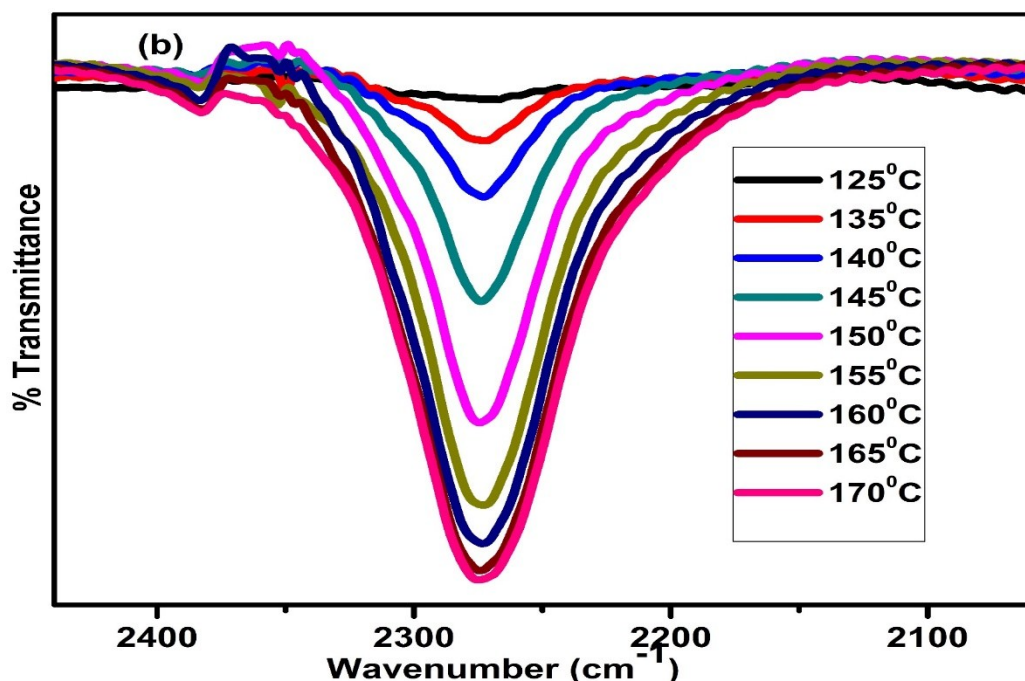

**Fig. S11.** FT-IR spectra of phenol -blocked polyisocyanate recorded at (a) different temperatures. (b) Zoomed range of isocyanate absorption region.

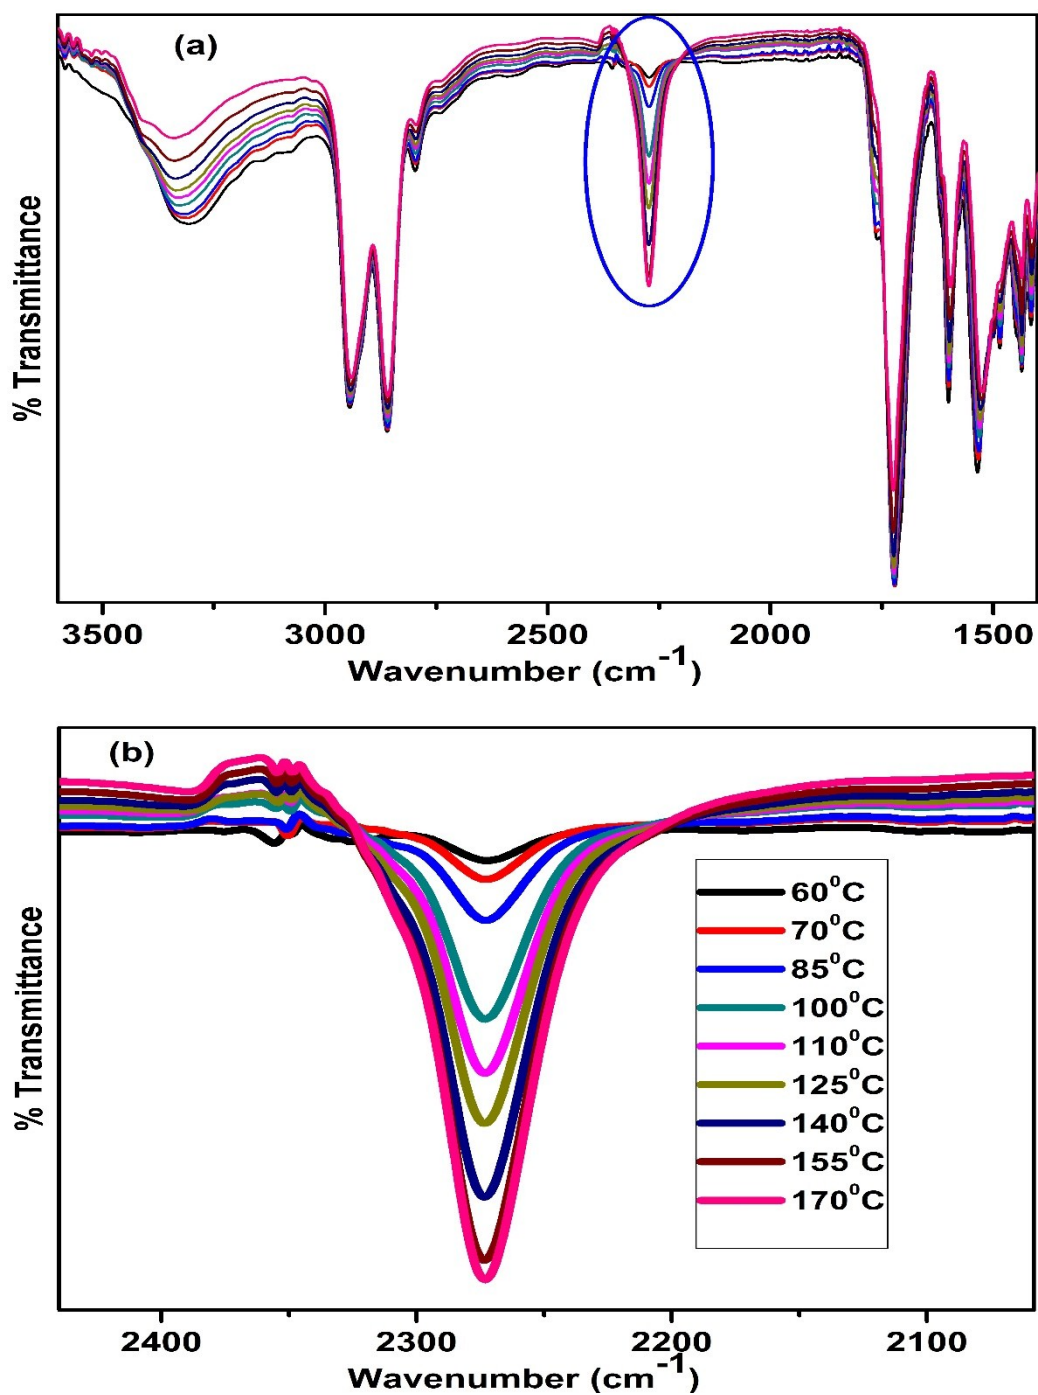



**Fig. S12.** FT-IR spectra of methyl 3-chloro-4-hydroxybenzoate-blocked polyisocyanate recorded at (a) different temperatures. (b) Zoomed range of isocyanate absorption region.

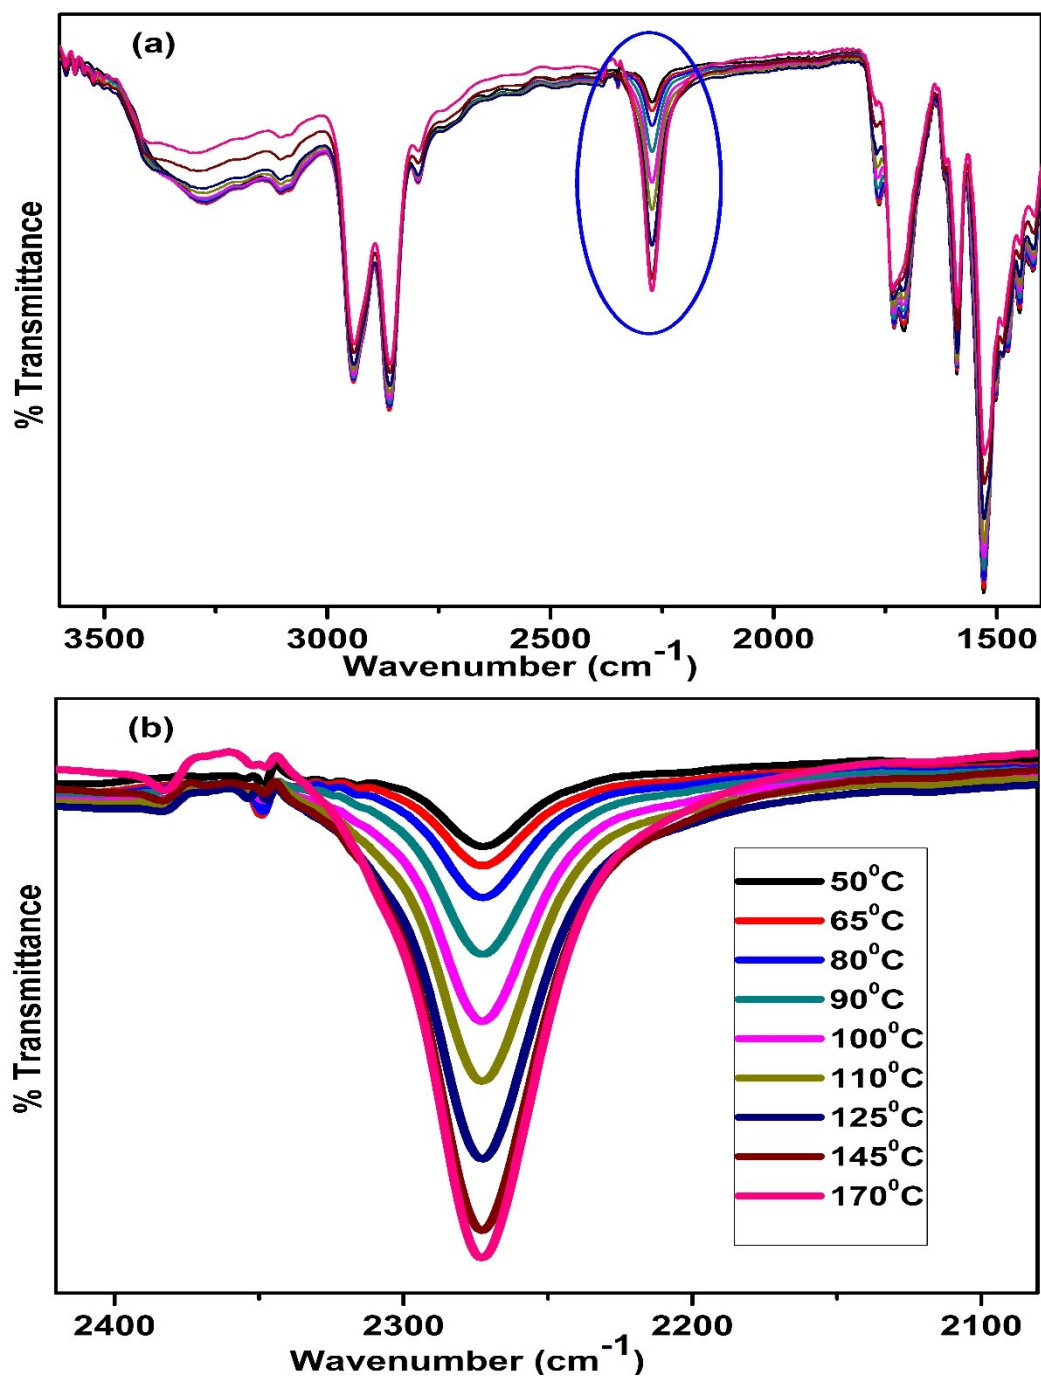

**Fig. S13.** FT-IR spectra of 2-chloro-4-nitrophenol -blocked polyisocyanate recorded at (a) different temperatures. (b) Zoomed range of isocyanate absorption region.

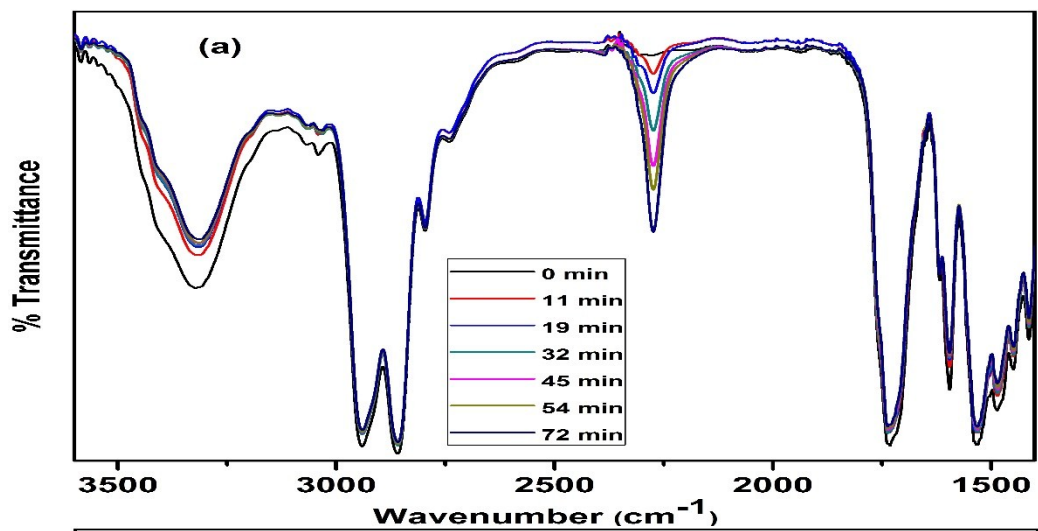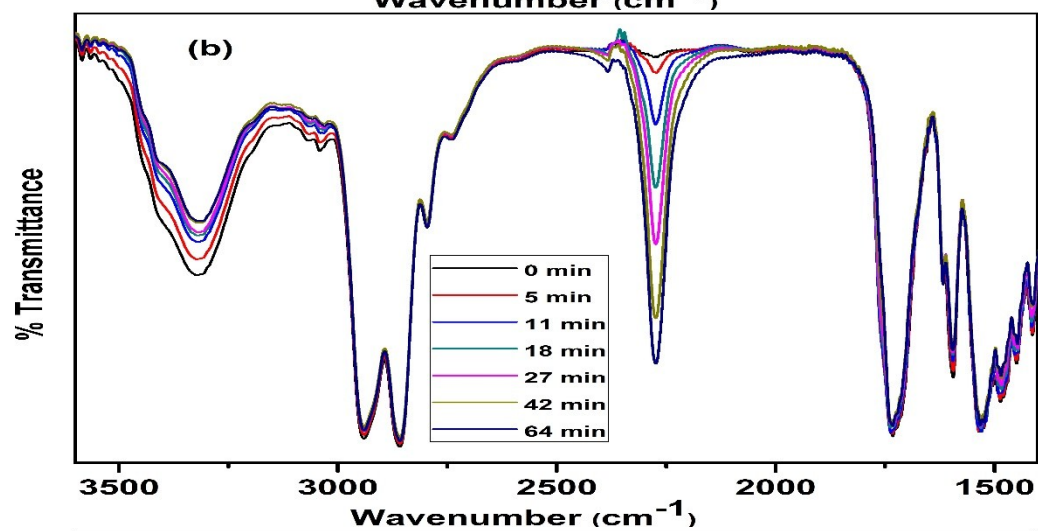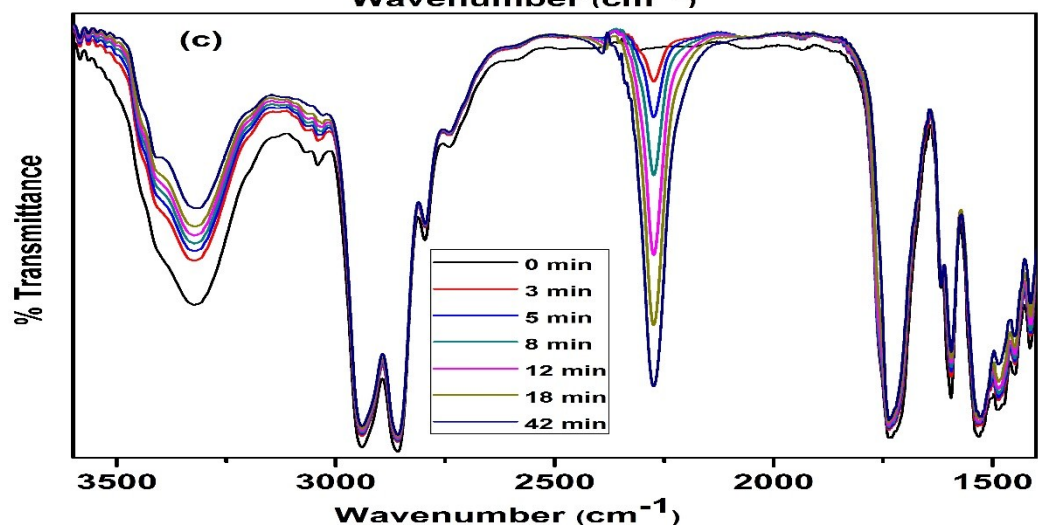

**Fig. S14.** FT-IR spectra recorded for different time intervals at isothermal conditions for the deblocking reaction of phenol -blocked polyisocyanate: (a) 110 °C (b) 120 °C and (c) 130 °C.

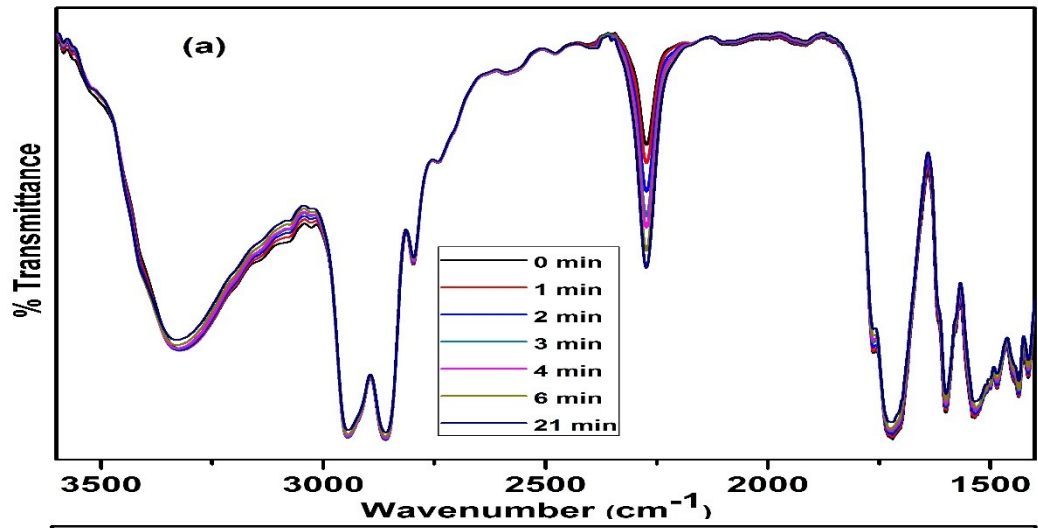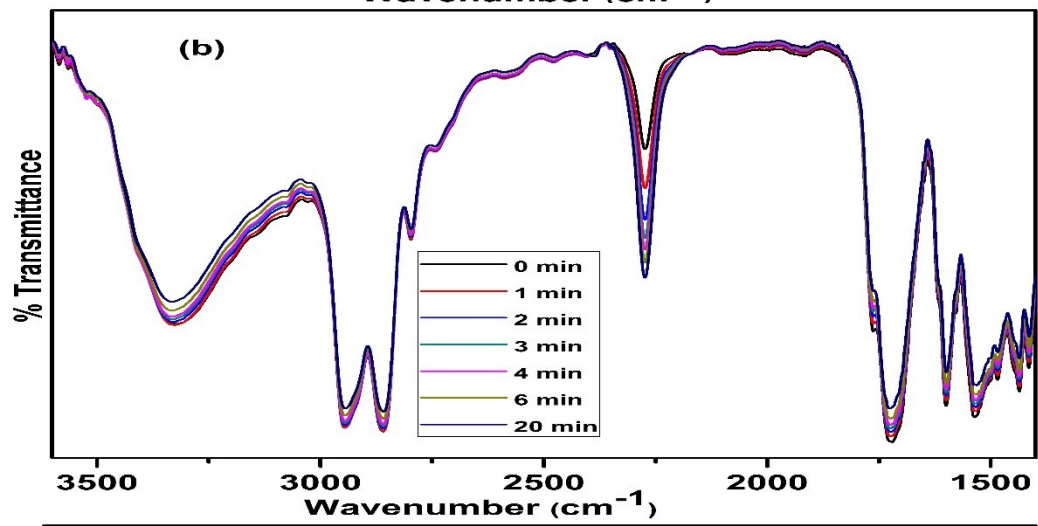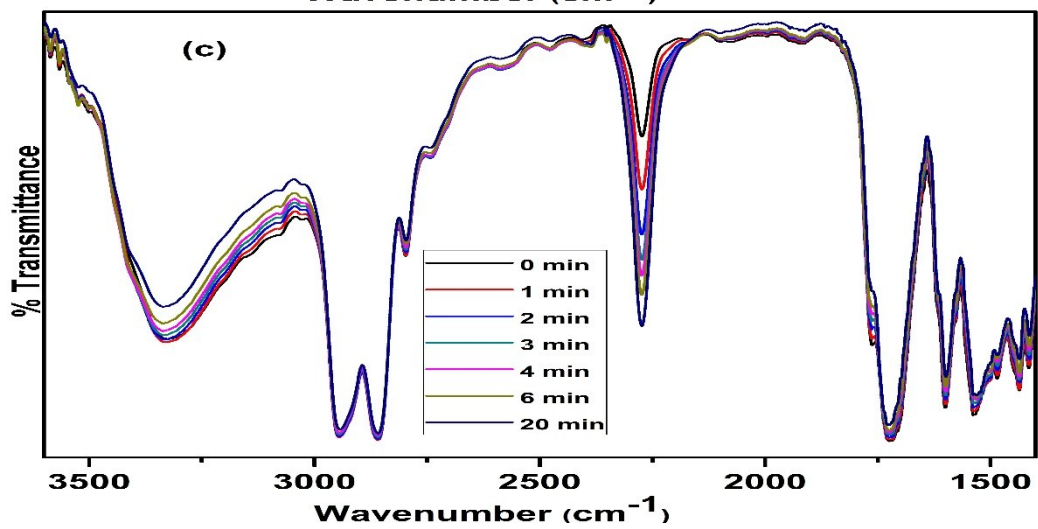

**Fig. S15.** FT-IR spectra recorded for different time intervals at isothermal conditions for the deblocking reaction of methyl 3-chloro-4-hydroxybenzoate -blocked polyisocyanate: (a) 90 °C (b) 100 °C and (c) 110 °C.

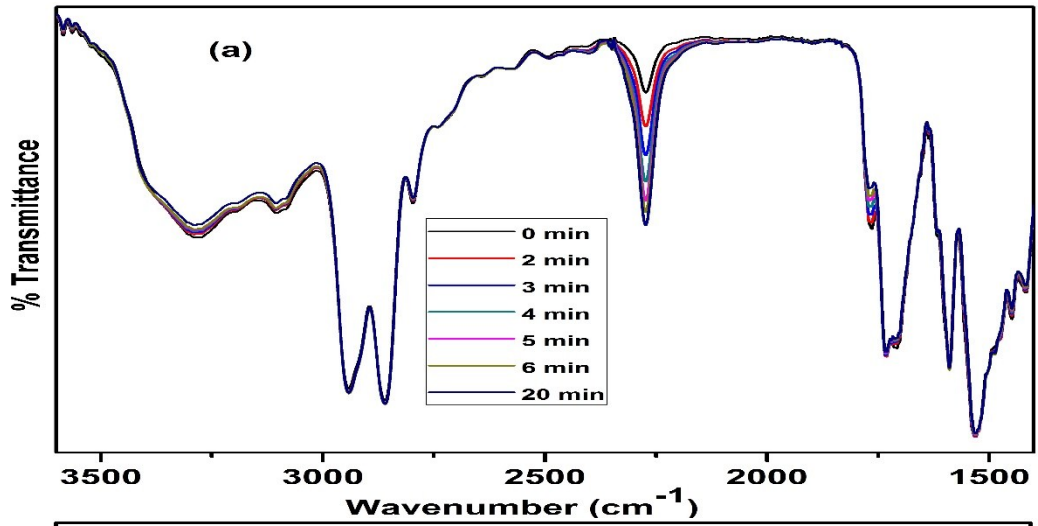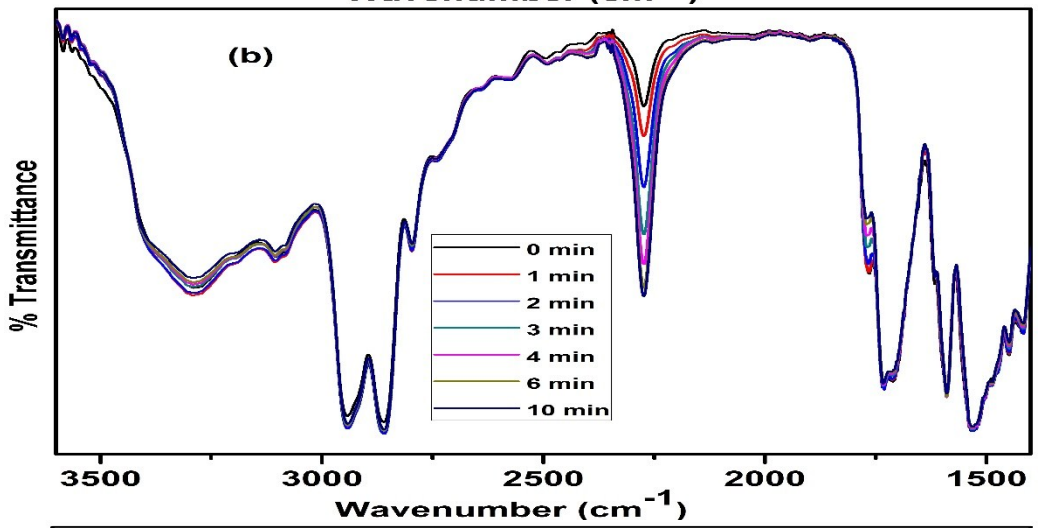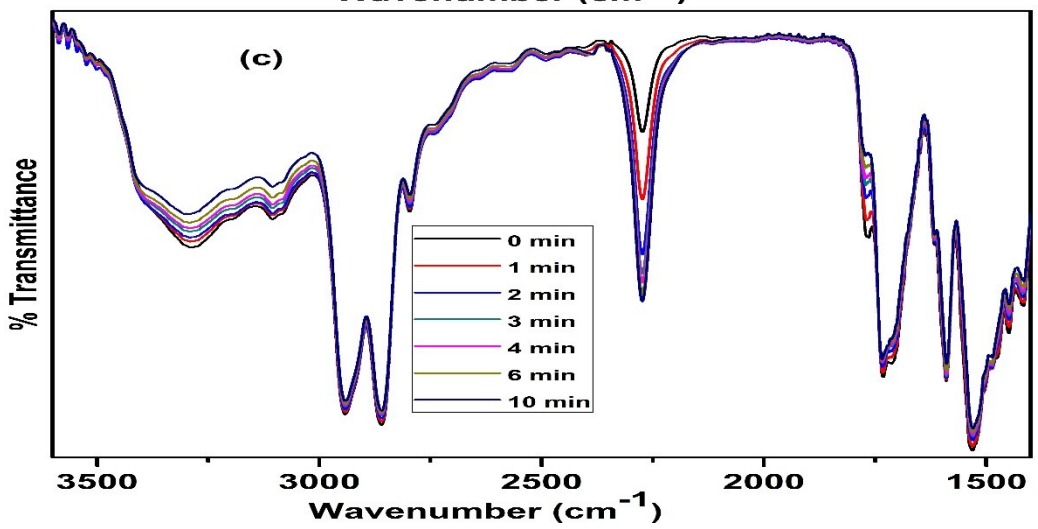

**Fig. S16.** FT-IR spectra recorded for different time intervals at isothermal conditions for the deblocking reaction of 2-chloro-4-nitrophenol -blocked polyisocyanate: (a) 90 °C (b) 100 °C and (c) 110 °C.



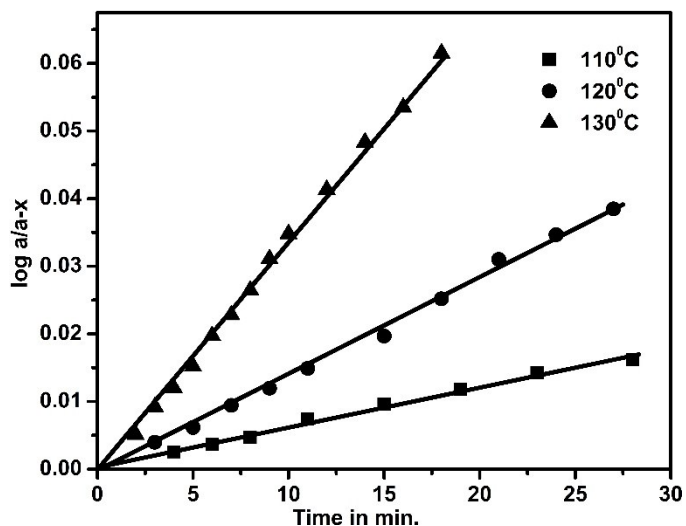

**Fig. S17.** Amine-catalyzed first-order kinetic plots of deblocking reaction of phenol-blocked polyisocyanate.

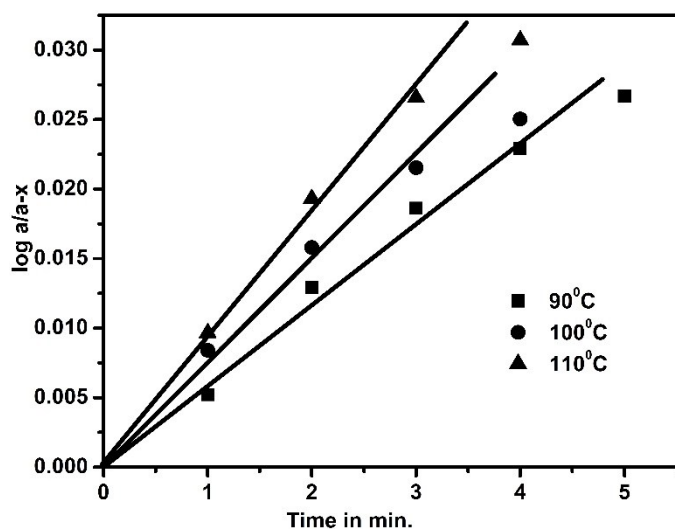

**Fig. S18.** Amine-catalyzed first-order kinetic plots of deblocking reaction of 3-chloro-4-hydroxybenzoate-blocked polyisocyanate.

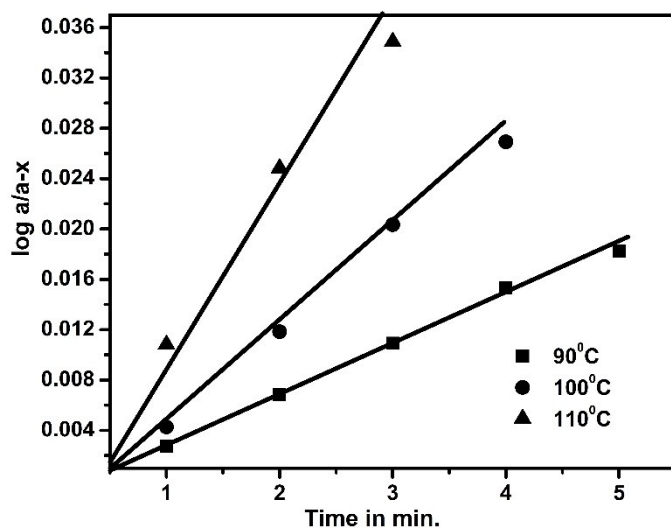

**Fig. S19.** Amine-catalyzed first-order kinetic plots of deblocking reaction of 2-chloro-4-nitrophenol-blocked polyisocyanate.
